# Supplementary material
Source: publisher figshare collection journal article supplement (https://frontiersin.figshare.com/ndownloader/files/30662558)
Supplement: Supplementary file 1 [file 30662558]

Thanks for doing the survey!

\* 1. In the past 7 days, roughly how much total time have you spent in the ocean?

☐

None

☐

3-4 hours

☐

less than 1 hour

☐

4-6 hours

☐

1-2 hours

☐

more than 6 hours

☐

2-3 hours

2. In the past week, where did you surf/spend time in the ocean?

Monday

Tuesday

Wednesday

Thursday

Friday

Saturday

Sunday

\* 3. Have you had any of these health symptoms in the past seven days (check all that apply)?

- |                                                                |                                                                |                                                                       |
|----------------------------------------------------------------|----------------------------------------------------------------|-----------------------------------------------------------------------|
| <input type="checkbox"/> Headache                              | <input type="checkbox"/> Fever                                 | <input type="checkbox"/> Asthma                                       |
| <input type="checkbox"/> Diarrhea or loose stools              | <input type="checkbox"/> Chills                                | <input type="checkbox"/> infection of open cuts/sores/wounds          |
| <input type="checkbox"/> Stomach pain or cramps                | <input type="checkbox"/> Throwing up or vomiting               | <input type="checkbox"/> Sunburn                                      |
| <input type="checkbox"/> Earache, ear infection, or discharge  | <input type="checkbox"/> Nausea                                | <input type="checkbox"/> neck pain                                    |
| <input type="checkbox"/> Eye infection, irritation, or redness | <input type="checkbox"/> Flu                                   | <input type="checkbox"/> back pain                                    |
| <input type="checkbox"/> Skin rash or itchy skin               | <input type="checkbox"/> Cold                                  | <input type="checkbox"/> shoulder pain                                |
| <input type="checkbox"/> Sore throat                           | <input type="checkbox"/> Swollen glands                        | <input type="checkbox"/> short term memory problem                    |
| <input type="checkbox"/> Cough                                 | <input type="checkbox"/> Respiratory irritation                | <input type="checkbox"/> seizures                                     |
| <input type="checkbox"/> Sneezing                              | <input type="checkbox"/> Dizziness                             | <input type="checkbox"/> Went to health care provider due to symptoms |
| <input type="checkbox"/> Nasal congestion                      | <input type="checkbox"/> Confusion/disorientation              | <input type="checkbox"/> No                                           |
| <input type="checkbox"/> Runny nose/excessive mucus            | <input type="checkbox"/> Trouble breathing/shortness of breath |                                                                       |
| <input type="checkbox"/> Sinus infection or sinus pain         | <input type="checkbox"/> Allergies                             |                                                                       |

Other (please specify)

4. Do you think any of these symptoms were due to allergies or asthma?

- |                                         |                                                     |
|-----------------------------------------|-----------------------------------------------------|
| <input type="checkbox"/> Yes, allergies | <input type="checkbox"/> No                         |
| <input type="checkbox"/> Yes, asthma    | <input type="checkbox"/> I didn't have any symptoms |

Other (please specify)

\* 5. Have any people that you live with been sick in the past week with any of the following (check all that apply)?

- |                                                                |                                               |                                                  |
|----------------------------------------------------------------|-----------------------------------------------|--------------------------------------------------|
| <input type="checkbox"/> Diarrhea or loose bowels              | <input type="checkbox"/> Sore throat or cough | <input type="checkbox"/> Throwing up or vomiting |
| <input type="checkbox"/> Stomach pain or cramps                | <input type="checkbox"/> Fever                | <input type="checkbox"/> Nasal congestion        |
| <input type="checkbox"/> Earache, ear infection, or discharge  | <input type="checkbox"/> Chills               | <input type="checkbox"/> Runny nose              |
| <input type="checkbox"/> Eye infection, irritation, or redness | <input type="checkbox"/> Cold                 | <input type="checkbox"/> Nausea                  |
| <input type="checkbox"/> Skin rash or itchy skin               | <input type="checkbox"/> Flu                  | <input type="checkbox"/> No                      |

Other (please specify)

\* 6. How do you support ocean conservation?

- ☐ Spend time in the ocean
- ☐ Talk with friends/family about ocean issues
- ☐ Reduce my carbon footprint
- ☐ Reduce use of plastic products
- ☐ Volunteer or docent for an ocean nonprofit
- ☐ Donate money to ocean nonprofits
- ☐ Eat sustainable seafood, eat local fish, eat wild fish
- ☐ Contact government representatives and lawmakers about ocean issues
- ☐ Vote in support of ocean conservation issues
- ☐ Prevent chemicals, pesticides, & fertilizers at home from going down the storm drain
- ☐ Other (please specify)

\* 7. How did spending time in the ocean impact your health in the past seven days?

Please check all that apply.

- |                                                                            |                                                           |                                                      |
|----------------------------------------------------------------------------|-----------------------------------------------------------|------------------------------------------------------|
| <input type="checkbox"/> calming/relaxing, decreased anxiety/stress        | <input type="checkbox"/> increased pain, physical workout | <input type="checkbox"/> improved life satisfaction  |
| <input type="checkbox"/> increased stress/anxiety                          | <input type="checkbox"/> slept better                     | <input type="checkbox"/> felt more generous          |
| <input type="checkbox"/> anger with bad etiquette of new surfers           | <input type="checkbox"/> increased happiness, got stoked  | <input type="checkbox"/> it's my refuge              |
| <input type="checkbox"/> awe inspiring                                     | <input type="checkbox"/> improved mood                    | <input type="checkbox"/> spiritual connection        |
| <input type="checkbox"/> got injured - cuts, sprains, stitches, concussion | <input type="checkbox"/> no benefit                       | <input type="checkbox"/> better productivity at work |
| <input type="checkbox"/> decreased depression                              | <input type="checkbox"/> connected with friends & others  |                                                      |
| <input type="checkbox"/> pain relief                                       | <input type="checkbox"/> time felt more plentiful         |                                                      |

Other (please specify)

8. In the past 7 days have you .....

- ☐ Come in contact with someone who complained of having diarrhea, vomiting, or stomach illness
- ☐ Touched or come in contact with animal feces
- ☐ Eaten raw eggs
- ☐ Eaten raw seafood ( raw fish or raw shellfish)
- ☐ Eaten unpasteurized/raw milk cheese or yogurt
- ☐ None of the above

9. What type of ocean activities did you do this past week?

- |                                |                                        |                                               |
|--------------------------------|----------------------------------------|-----------------------------------------------|
| <input type="checkbox"/> surf  | <input type="checkbox"/> spear fishing | <input type="checkbox"/> boogie board         |
| <input type="checkbox"/> SUP   | <input type="checkbox"/> snorkel       | <input type="checkbox"/> wind surf/ kite surf |
| <input type="checkbox"/> kayak | <input type="checkbox"/> swim          | <input type="checkbox"/> none                 |

Other (please specify)

10. Comments
